# Supplementary material
Source: PubMed Central journal article supplement (PMC6398484)
Supplement: joces-132-219386-s1.pdf [file joces-132-219386-s1.pdf]

GFP-Tub1

Kip3-TagRFP-T  
Rhodamine-seeds

Kip3-TagRFP-T GFP-Tub1  
Rhodamine-seeds

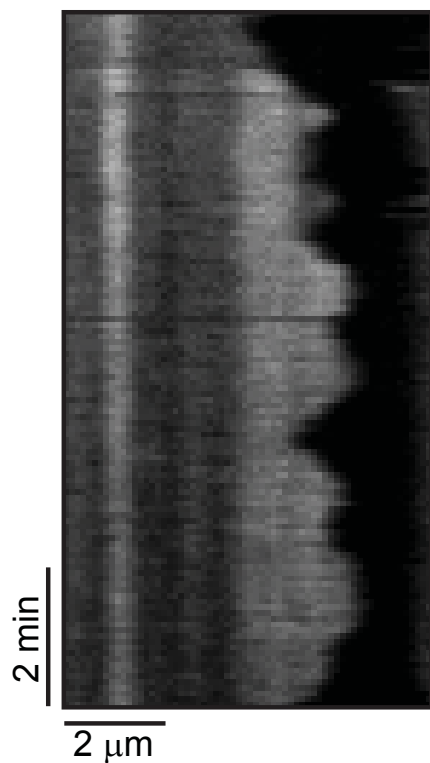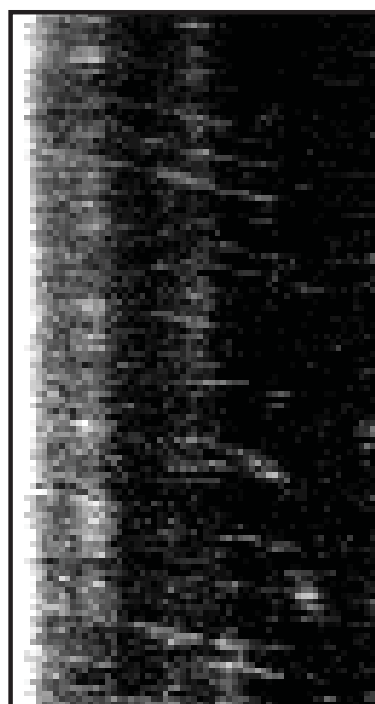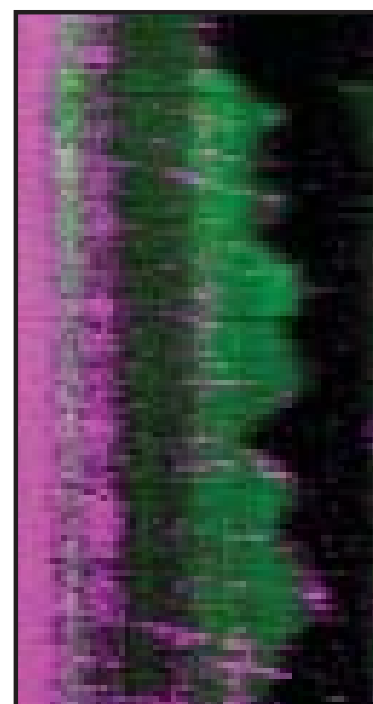

**Supplemental Figure 1. Kymograph of Kip3-TagRFP-T along GFP-Tub1 MTs.**

Motor proteins (magenta) will bind the MT (green) and move along the remaining length to the plus end.

Rhodamine-seeds GFP-Tub1

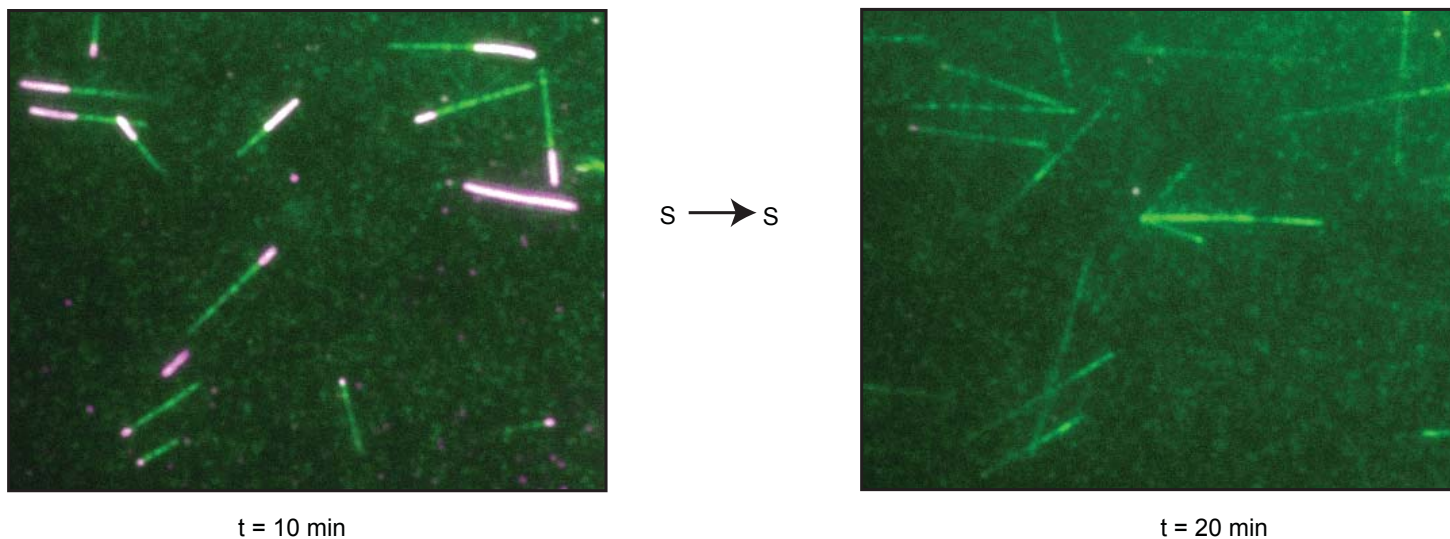

**Supplemental Figure 2. Sequential Flow-through of S-phase Lysate.** Fields of MTs and seeds in control experiments for lysate flow-through. MTs grew and were dynamic in lysate from S phase-arrested cells. More lysate was washed through the chamber and slightly interrupted the growth of existing MTs. After a short period, growth and dynamics resumed similar to those observed before the lysate replacement.

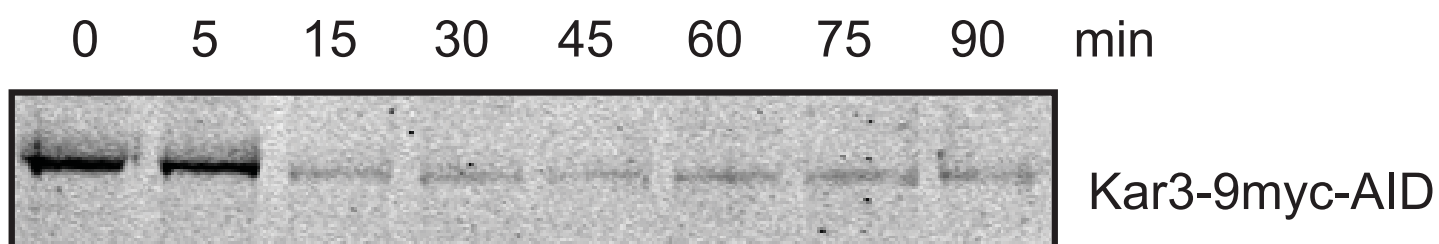

**Supplemental Figure 3. Depletion of Kar3 from Cells.** Western blot of protein lysate from fixed *KAR3-9myc-AID* cells treated with 250  $\mu$ M 3-indole acetic acid. Cells were harvested every 15 minutes and fixed.

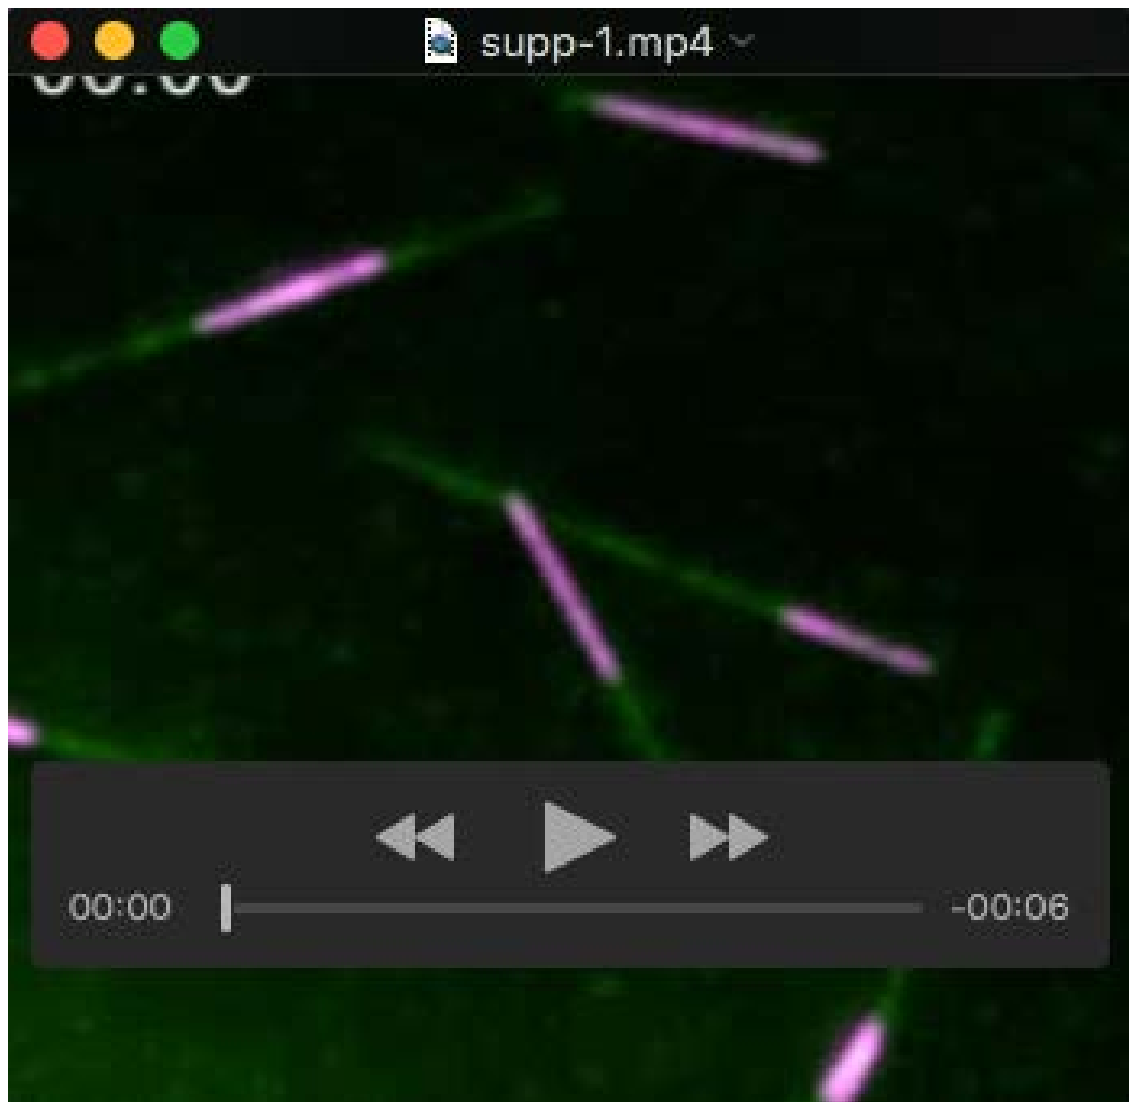

**Supplemental Movie 1. MTs in lysate from S phase-arrested cells.** GFP-Tub1 (green) and rhodamine-labeled seeds (magenta). Corresponds to kymographs in Figure 1A. Scale bar is 2  $\mu\text{m}$ . Playback is 20fps.

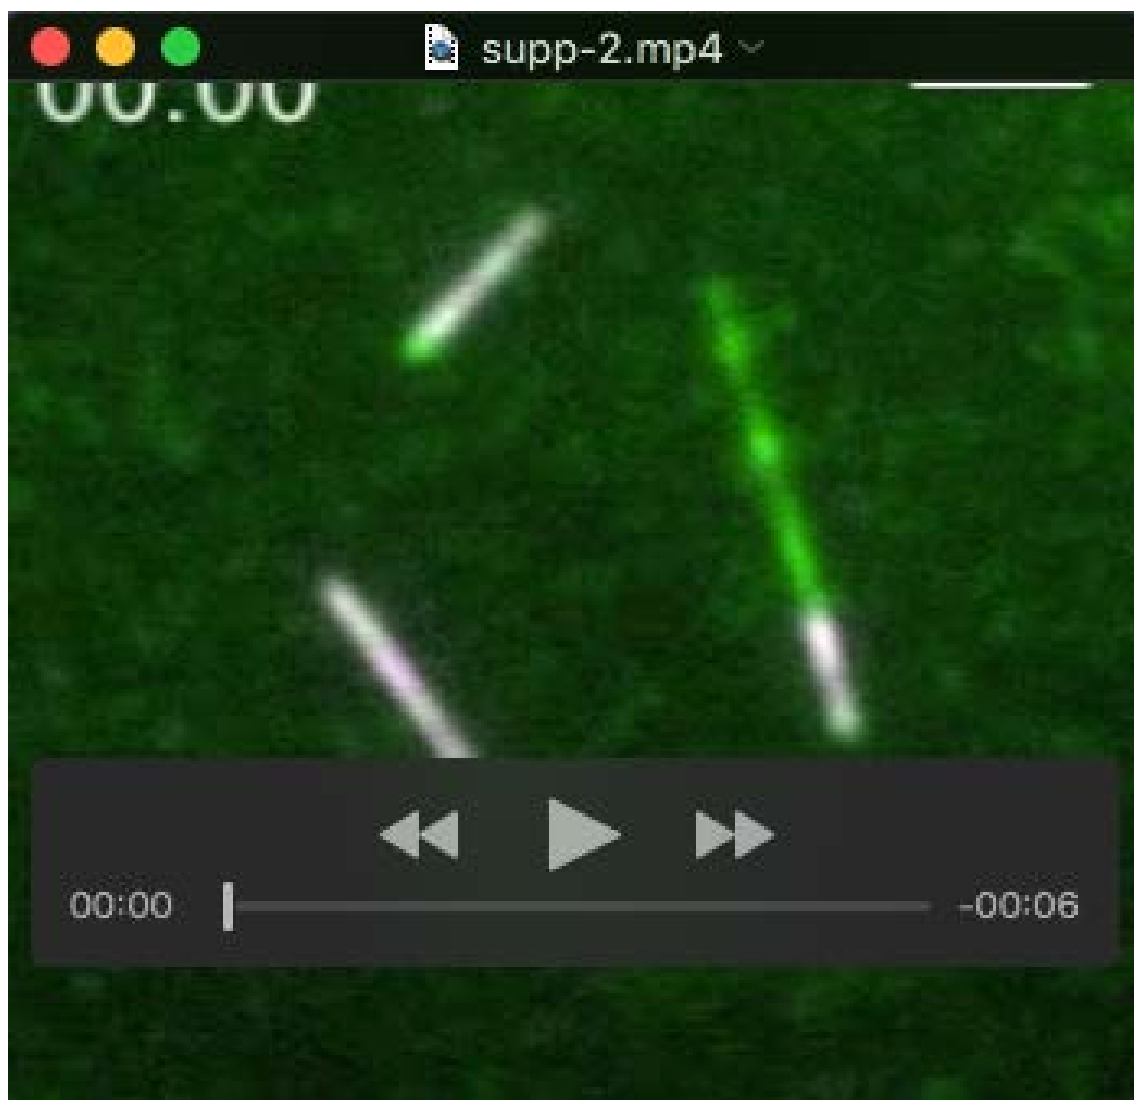

**Supplemental Movie 2. MTs in lysate from metaphase-arrested cells.** GFP-Tub1 (green) and rhodamine-labeled seeds (magenta). Corresponds to kymographs in Figure 1A. Scale bar is 2  $\mu$ m. Playback is 20fps.

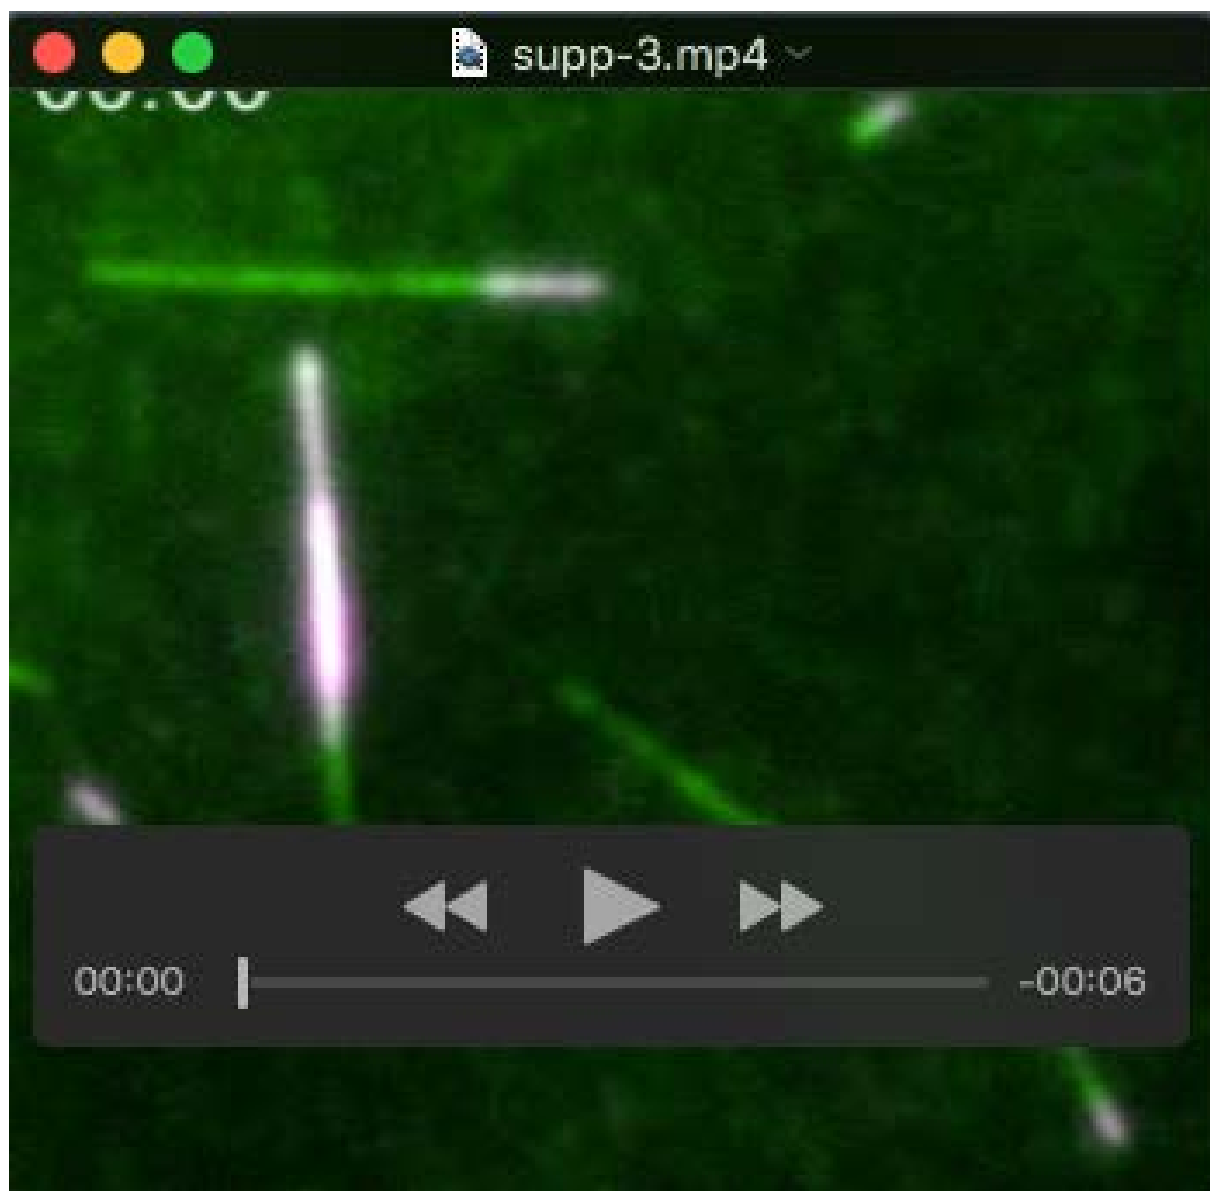

**Supplemental Movie 3. MTs in lysate from anaphase-arrested cells.** GFP-Tub1 (green) and rhodamine-labeled seeds (magenta). Corresponds to kymographs in Figure 1A. Scale bar is 2  $\mu\text{m}$ . Playback is 20fps.

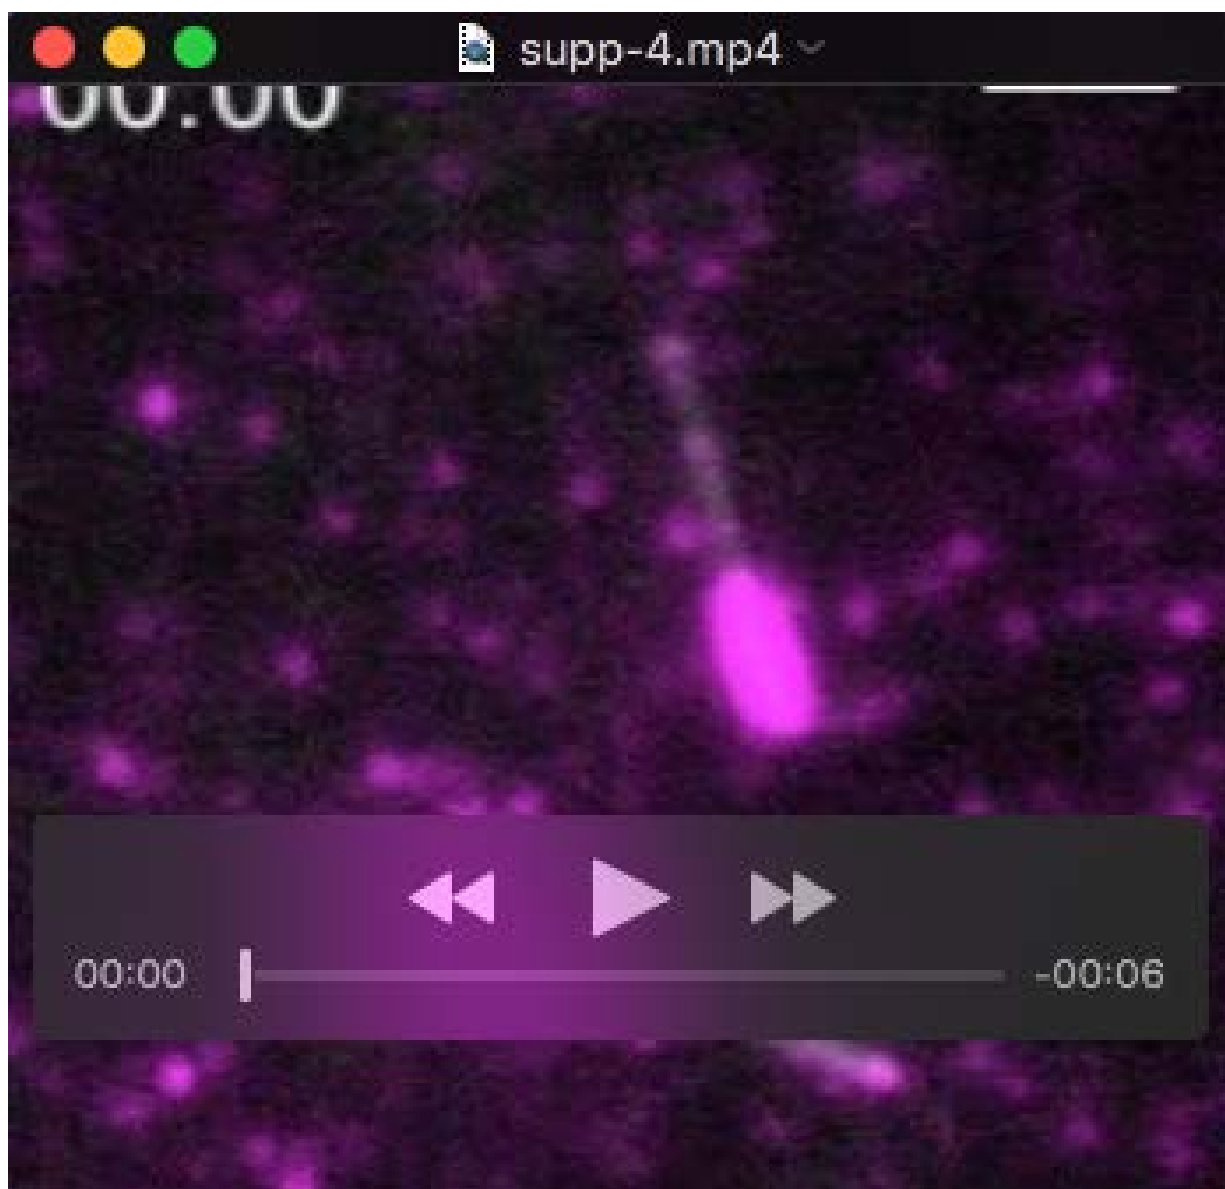

**Supplemental Movie 4. Association of Bim1 with MTs in lysate.** A zoomed-in view of Bim1-TagRFP-T (magenta) associated with MTs (green) along their length and accumulated at the plus ends from lysate of cells arrested in S phase. Rhodamine-labeled seeds are also in magenta at the minus ends. Corresponds to kymographs in Figure 3A. Scale bar is 2  $\mu$ m. Playback is 20fps.

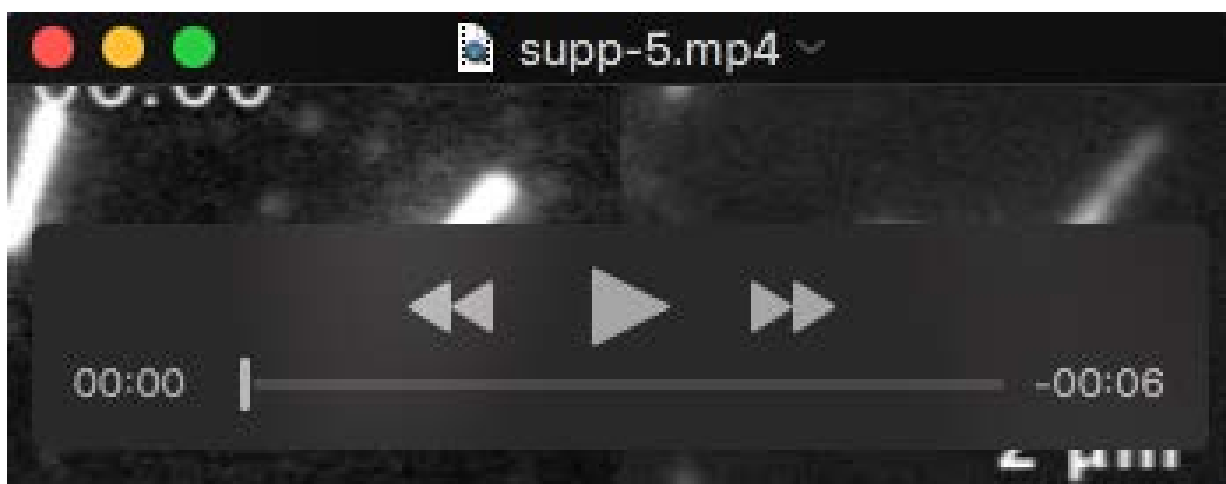

**Supplemental Movie 5. Translocation of Kip3 along MTs in Lysate.** Kip3-TagRFP-T (traveling dots) and rhodamine-labeled seeds (bright bars) on the left and GFP-tubulin MTs on the right from lysate of cells arrested in metaphase. Kip3-TagRFP-T puncta bound along the MT and moved towards the plus end. Corresponds to kymographs in Figure S1. Scale bar is 2  $\mu\text{m}$ . Playback is 20fps.



**Supplementary Table 1.** Strains Used in this Study

| <b>Strain Name</b> | <b>Genotype</b>                                                                                                                                                                                              |
|--------------------|--------------------------------------------------------------------------------------------------------------------------------------------------------------------------------------------------------------|
| DDY3435            | <i>MAT<math>\alpha</math></i> , <i>lys2-801</i> , <i>his3<math>\Delta</math>-200</i> , <i>leu2-3, 112</i> , <i>ura3-52::GFP-TUB1::URA3</i>                                                                   |
| DDY5662            | <i>MAT<math>\alpha</math></i> , <i>lys2-801</i> , <i>his3<math>\Delta</math>-200</i> , <i>leu2-3, 112</i> , <i>ura3-52::GFP-TUB1::URA3</i> , <i>cdc28-4</i>                                                  |
| DDY5663            | <i>MAT<math>\alpha</math></i> , <i>lys2-801</i> , <i>his3<math>\Delta</math>-200</i> , <i>leu2-3, 112</i> , <i>ura3-52::GFP-TUB1::URA3</i> , <i>cdc7-1</i>                                                   |
| DDY5664            | <i>MAT<math>\alpha</math></i> , <i>lys2-801</i> , <i>his3<math>\Delta</math>-200</i> , <i>leu2-3, 112</i> , <i>ura3-52::GFP-TUB1::URA3</i> , <i>cdc23-1</i>                                                  |
| DDY5665            | <i>MAT<math>\alpha</math></i> , <i>lys2-801</i> , <i>his3<math>\Delta</math>-200</i> , <i>leu2-3, 112</i> , <i>ura3-52::GFP-TUB1::URA3</i> , <i>cdc15-2</i>                                                  |
| DDY5666            | <i>MAT<math>\alpha</math></i> , <i>lys2-801</i> , <i>his3<math>\Delta</math>-200</i> , <i>leu2-3, 112</i> , <i>ura3-52::GFP-TUB1::URA3</i> , <i>BIM1-TagRFP-T::kanMX</i> , <i>cdc7-1</i>                     |
| DDY5667            | <i>MAT<math>\alpha</math></i> , <i>lys2-801</i> , <i>his3<math>\Delta</math>-200</i> , <i>leu2-3, 112</i> , <i>ura3-52::GFP-TUB1::URA3</i> , <i>KIP3-TagRFP-T::HIS3MX</i> , <i>cdc23-1</i>                   |
| DDY5668            | <i>MAT<math>\alpha</math></i> , <i>lys2-801</i> , <i>his3<math>\Delta</math>-200</i> , <i>leu2-3, 112</i> , <i>kip3<math>\Delta</math>::kanMX</i> , <i>ura3-52::GFP-TUB1::URA3</i>                           |
| DDY5669            | <i>MAT<math>\alpha</math></i> , <i>lys2-801</i> , <i>his3<math>\Delta</math>-200</i> , <i>leu2-3, 112</i> , <i>kip3<math>\Delta</math>::kanMX</i> , <i>ura3-52::GFP-TUB1::URA3</i> , <i>cdc28-4</i>          |
| DDY5670            | <i>MAT<math>\alpha</math></i> , <i>lys2-801</i> , <i>his3<math>\Delta</math>-200</i> , <i>leu2-3, 112</i> , <i>kip3<math>\Delta</math>::kanMX</i> , <i>ura3-52::GFP-TUB1::URA3</i> , <i>cdc7-1</i>           |
| DDY5671            | <i>MAT<math>\alpha</math></i> , <i>lys2-801</i> , <i>his3<math>\Delta</math>-200</i> , <i>leu2-3, 112</i> , <i>kip3<math>\Delta</math>::kanMX</i> , <i>ura3-52::GFP-TUB1::URA3</i> , <i>cdc23-1</i>          |
| DDY5672            | <i>MAT<math>\alpha</math></i> , <i>lys2-801</i> , <i>his3<math>\Delta</math>-200</i> , <i>leu2-3, 112</i> , <i>kip3<math>\Delta</math>::kanMX</i> , <i>ura3-52::GFP-TUB1::URA3</i> , <i>cdc15-2</i>          |
| DDY5673            | <i>MAT<math>\alpha</math></i> , <i>lys2-801</i> , <i>his3<math>\Delta</math>-200</i> , <i>leu2-3, 112</i> , <i>KAR3-9myc-AID::HIS3</i> , <i>TIR1::LEU2</i> , <i>ura3-52::GFP-TUB1::URA3</i>                  |
| DDY5674            | <i>MAT<math>\alpha</math></i> , <i>lys2-801</i> , <i>his3<math>\Delta</math>-200</i> , <i>leu2-3, 112</i> , <i>KAR3-9myc-AID::HIS3</i> , <i>TIR1::LEU2</i> , <i>ura3-52::GFP-TUB1::URA3</i> , <i>cdc28-4</i> |

|         |                                                                                                                                                                                      |
|---------|--------------------------------------------------------------------------------------------------------------------------------------------------------------------------------------|
| DDY5675 | <i>MAT<math>\alpha</math>, lys2-801, his3<math>\Delta</math>-200, leu2-3, 112, KAR3-9myc-AID::HIS3, TIR1::LEU2, ura3-52::GFP-TUB1::URA3, cdc7-1</i>                                  |
| DDY5676 | <i>MAT<math>\alpha</math>, lys2-801, his3<math>\Delta</math>-200, leu2-3, 112, KAR3-9myc-AID::HIS3, TIR1::LEU2, ura3-52::GFP-TUB1::URA3, cdc23-1</i>                                 |
| DDY5677 | <i>MAT<math>\alpha</math>, lys2-801, his3<math>\Delta</math>-200, leu2-3, 112, KAR3-9myc-AID::HIS3, TIR1::LEU2, ura3-52::GFP-TUB1::URA3, cdc15-2</i>                                 |
| DDY5678 | <i>MAT<math>\alpha</math>, lys2-801, his3<math>\Delta</math>-200, leu2-3, 112, KAR3-9myc-AID::HIS3, TIR1::LEU2, ura3-52::GFP-TUB1::URA3, kip3<math>\Delta</math>::kanMX</i>          |
| DDY5679 | <i>MAT<math>\alpha</math>, lys2-801, his3<math>\Delta</math>-200, leu2-3, 112, KAR3-9myc-AID::HIS3, TIR1::LEU2, ura3-52::GFP-TUB1::URA3, kip3<math>\Delta</math>::kanMX, cdc28-4</i> |
| DDY5680 | <i>MAT<math>\alpha</math>, lys2-801, his3<math>\Delta</math>-200, leu2-3, 112, KAR3-9myc-AID::HIS3, TIR1::LEU2, ura3-52::GFP-TUB1::URA3, kip3<math>\Delta</math>::kanMX, cdc7-1</i>  |
| DDY5681 | <i>MAT<math>\alpha</math>, lys2-801, his3<math>\Delta</math>-200, leu2-3, 112, KAR3-9myc-AID::HIS3, TIR1::LEU2, ura3-52::GFP-TUB1::URA3, kip3<math>\Delta</math>::kanMX, cdc15-2</i> |
| DDY5682 | <i>MAT<math>\alpha</math>, lys2-801, his3<math>\Delta</math>-200, leu2-3, 112, ura3-52::GFP-TUB1::URA3, cik1<math>\Delta</math>::HIS3</i>                                            |
| DDY5683 | <i>MAT<math>\alpha</math>, lys2-801, his3<math>\Delta</math>-200, leu2-3, 112, ura3-52::GFP-TUB1::URA3, vik1<math>\Delta</math>::HIS3</i>                                            |

All strains were constructed for this study, except for DDY3435 (source: Drubin/Barnes lab). All strains are S288C background.
